1

2

3

4 **Burnout and sleep problems among nurses working in a tertiary hospital in**

5 **Kathmandu, Nepal**

6

7

8 Manoj Panthi Kanak<sup>1\*</sup>, Smriti Pant<sup>1</sup>

9 <sup>1</sup>Institute of Medicine, Tribhuvan University, Maharajgunj, Kathmandu, Nepal

10

11 \*Corresponding author

12 Email: [manojpanthi@iom.edu.np](mailto:manojpanthi@iom.edu.np) (MPK)

1

13 **Abstract**

14 Burnout is defined as sustained response to chronic work-related stresses and is often measured in  
15 dimensions of emotional exhaustion, disengagement and feeling of low personal accomplishment.  
16 Burnout and sleep problems has been closely associated among healthcare providers, confirmed  
17 in many observational studies. However, there was a dearth in information regarding burnout and  
18 sleep problems among nurses from Nepal, hence this study was conducted. This was a cross-  
19 sectional study in which quantitative method was applied. Data was collected from 246 nurses  
20 working in the Tribhuvan University Teaching Hospital using simple random sampling method  
21 through self-administered questionnaire between March and April, 2022. Structured questions for  
22 personal and work-related characteristics were used while Oldenburg Burnout Inventory and  
23 Pittsburgh Sleep Quality Index were used to assess burnout and sleep problems, respectively. More  
24 than three out of four nurses (78.5%) were found to have burnout, with 88.3% disengaged and  
25 83.0% exhausted. Likewise, almost half of the nurses (40.2%) were found to have a poor sleep  
26 quality. Using multivariate logistics regression analysis, factors like position of the nurse (AOR =  
27 6.0, 95% CI; 1.9-18.8) and, slight problem (AOR = 6.6, 95% CI; 3.0-14.7) and somewhat to a big  
28 problem (AOR = 6.3, 95% CI; 1.9-20.9) of daytime dysfunction were found to be significantly  
29 associated with burnout. Similarly, age, work experience and beds-to-nurses ratio of the  
30 department was found to be significantly associated to burnout among the nurses using  
31 independent sample t-test. These results indicate the necessity to reduce work stress and manage  
32 sleep problems of the nurses prioritizing the nursing staffs occupying junior position. Similarly,  
33 establishment of interventions like psychological help desk and support groups for the nurses could  
34 be beneficial to mitigate the effects of burnout and sleep problems among nurses.

## 35 **Introduction**

36 Nurses are a workforce who have to provide continuous medical care for 24 hours a day in a work  
37 environment which is demanding and full of physical and emotional stressors [1,2]. Studies show  
38 that stress is a factor that affects nurses on a daily basis and can result in nurses' absenteeism and  
39 aggression as well as reduced productivity and efficiency, diminishing the quality of care and  
40 patient safety [3,4]. Shift work has been found to interfere with the circadian and homeostatic  
41 regulation of sleep of the nurses causing most nurses working night shifts to struggle adjusting to  
42 daytime activities or normal night sleep patterns on their days off [4].

43 Burnout is defined as a sustained response to chronic work-related stresses and is often measured  
44 in three dimensions, namely: a) emotional exhaustion; experience of being emotionally exhausted,  
45 b) depersonalization or disengagement; establishment of detached, distant, and cynical  
46 relationships with patients and colleagues and, c) feeling of low personal accomplishment and  
47 professional failure [5,6]. With increasing work-culture and high demanding jobs, burnout affects  
48 workers in a growing number of professions and nurses including other healthcare providers are  
49 among the most often affected [5]. Nursing is an occupational area presenting one of the highest  
50 levels of work-related stress and burnout, which has been associated to various occupational and  
51 personal factors [5,7]. Burnout and sleep problems has been closely associated among healthcare  
52 providers and this relation has been confirmed in many observational studies among other types  
53 of workers as well [7].

54 A good sleep is vital for maintaining good health as it affects hormonal levels, mood and  
55 physiology. Besides the role of sleep in learning, memory consolidation and motor learning,  
56 essential in any professional domain, it has a key role in emotional regulation as well [7].  
57 Complaints of fatigue and insufficient or poor quality of sleep is common among nurses working

58 in 12 hours shifts. Nurses working successively on 12-hours shifts were found to have poor  
59 physical and cognitive recovery due to inadequate amount of sleep between the shifts, in a study  
60 from the United States [8]. Association between dissatisfaction with sleep patterns and emotional  
61 exhaustion among nurses, and a high level of depersonalization among those working the day shift  
62 was found in a Brazilian study [1]. Between 57% and 83.2% of shift nurses worldwide report sleep  
63 problems, including sleep disturbances, sleep deprivation, and poor sleep quality [4]. Insufficient  
64 sleep is a potential cause of burnout, explored in a study among professionals from an information-  
65 technology company where less than six hours of sleep at night was the main risk factor for  
66 developing burnout [9].

67 In a multinational study of 2018 which also included Nepal, the level of burnout among nurses  
68 working in intensive care units was found to be 52.0%,  $P = 0.362$  [6]. There is no data on  
69 prevalence of burnout and sleep problems among nurses in Nepal however, studies among medical  
70 students from Nepal has shown prevalence of burnout among 65.9% and poor sleep quality among  
71 38.2% [10,11]. This study was carried out to determine the situation of burnout, sleep quality and,  
72 their correlates among nurses working in a tertiary hospital in Kathmandu, Nepal. Data collection  
73 was done among 246 nurses working in the Tribhuvan University Teaching Hospital (TUTH)  
74 between March and April, 2022.

## 75 **Materials and methods**

### 76 **Study sample**

77 The study followed the simple random sampling method, using computerized number generator  
78 without replacement. The details of the study population were obtained from the administrative  
79 section of the hospital. A list of the nurses was developed with each unit of these total study  
80 population assigned a unique id, and computerized system was used to pick the required sample

81 size from the list. Those selected were noted and contacted through their supervisors, and after  
82 receiving their written consent the questionnaire was distributed. The study was carried out in  
83 TUTH, Maharajgunj, Nepal. TUTH was selected as study site because TUTH is one of the largest  
84 tertiary hospitals in Nepal with a high patient load and with an adequate sample population of  
85 nurses.

86 The sample size was determined using the Cochran's formula for sample size collection from  
87 Sampling Techniques as stated in equation 1 [12].

$$88 \quad n = \frac{(Z^2 \times p \times q)}{e^2} \quad \text{equation 1}$$

89 Where

90 Z= standard normal deviation, usually set at 1.96 which corresponds to 95% confidence level

91 p = proportion in the target population estimated = 31% [5]

92 e = degree of accuracy required, usually set at 0.05 level

93 n = desired sample size which was calculated to be 328

94 For finite population N = 805 adjusted sample size was calculated to be 233 using equation 2

$$95 \quad \textit{Adjusted sample size} = n/[1 + \{(n - 1)/N\}] \quad \text{equation 2}$$

96 Again, with 10% of non-response rate the final sample size was determined to be 256

97 Among the 256 self-administered questionnaires distributed, a total of 246 were collected from the  
98 respondents indicating a non-response rate of 4%. Questionnaires were distributed in March, 2022  
99 and were collected within April, 2022. Data was entered and processed subsequently after  
100 collection.

### 101 **Tools for data collection**

102 The study used self-administered questionnaire with three sections; a) socio-demographic and  
103 work-related questions, followed by assessment of b) burnout and c) sleep quality. The first section

104 of the questionnaire was used to collect personal and work-related data. It included information  
105 regarding the age, gender, education level, marital status, health status, religiosity, cigarette use,  
106 alcohol use, exercise, work department and, the number of nurses and beds in the department.

107 Although Maslach Burnout Inventory is the most commonly used scale to measure burnout, it's  
108 third factor personal accomplishment has been shown to perform weakly [13]. Oldenburg Burnout  
109 Inventory (OLBI-S) which contains 16 items questionnaire focusing on the two dimensions of  
110 burnout; disengagement and exhaustion was thus used to assess burnout among the nurses in this  
111 study [14]. OLBI-S subscales consist of eight items each, among which four are worded positively  
112 and four are worded negatively. Participant's responses were collected on a four-point Likert scale  
113 ranging from 1 (strongly agree) to 4 (strongly disagree). Scores from the negatively worded eight  
114 items were reversed so that higher score corresponds to higher burnout level.

115 Pittsburgh Sleep Quality Index (PSQI) was used to assess sleep quality through its seven  
116 parameters namely: subjective sleep quality, sleep latency, sleep duration, habitual sleep  
117 efficiency, sleep disturbances, use of sleep medication and daytime dysfunction. Each of the seven  
118 component has a score between 0 (no problem) to 3 (severe problem) which is added to get the  
119 global PSQI score. Both the tools OLBI-S and PSQI have been previously used in Nepal in similar  
120 settings [10,11].

### 121 **Analytical strategy**

122 The scores from OLBI-S were categorized for prevalence of disengagement and exhaustion using  
123 the cutoff of mean  $\geq 2.10$  from disengagement subscale and mean  $\geq 2.25$  from exhaustion subscale  
124 [15]. Respondents who were found to be both disengaged and exhausted were termed 'Burnout'  
125 as shown in Figure 1 and the rest were termed 'No burnout' for bivariate analysis.

126 Figure 1: Classification of burnout using OLBI-S

127 *[Insert Figure 1 here]*

128 Higher score in PSQI indicate poorer sleep quality, and a global score of 5 has been established as  
129 the cutoff thus, those with score five or more were labelled to have a ‘poor sleep quality’ while the  
130 rest were labelled ‘good sleep quality’ [16].

131 The collected data was entered in EpiData v3.1 and was exported to SPSS 26 for analysis.  
132 Descriptive statistics including frequencies and means were calculated from the demographic data,  
133 PSQI global scores and Burnout score including sub scores disengagement and exhaustion. Binary  
134 logistic regression and independent sample t-test were carried wherever suitable with burnout as  
135 an outcome of interest (with 1 = yes and 0 = no). Variables with a p-value less than 0.1 during  
136 bivariate analysis were fitted into the multivariate regression model [17]. The adjusted odds ratio  
137 was calculated at a 95% CI, and a p-value less than 0.05 was considered statistically significant.  
138 The value of Cronbach’s Alpha for 16 items of OLBI-S was 0.787 indicating a good level of  
139 internal consistency.

#### 140 **Ethical consideration**

141 Letter of approval was taken from Institutional Review Committee – Institute of Medicine  
142 (Reference number: 339(6-11)E2078/079), Central Department of Public Health – Institute of  
143 Medicine and TUTH to carry out the research. The research was carried out with the written  
144 informed consent of the participants and their voluntary enrollment after thoroughly informing  
145 about the research objectives and their responsibilities as research respondents. Confidentiality of  
146 the data collected was ensured through coding of each response and the respondents were kept  
147 anonymous.

148 **Results**

149 **Socio-demographic characteristics of the study participants**

150 The age of the 246 study participants was distributed from 20 to 59 years with mean age of 30  
151 years. Of the study participants, 80.5% had a Bachelor degree (Bachelor of Science in Nursing or  
152 Bachelor in Nursing), 56.5% were married and 89.4% were religious. In the last month from the  
153 data collection, 58.5% had not exercised, 91.9% had not consumed alcohol and 99.2% had not  
154 consumed cigarette (  
155 Table 1).

156 Table 1: Socio-demographic characteristics of the study participants.

N=246

| Characteristics     | Number | Percentage |
|---------------------|--------|------------|
| Age (years)         |        |            |
| Mean                | 30     |            |
| SD                  | ±7.51  |            |
| Highest education   |        |            |
| Diploma/PCL Nursing | 37     | 15.0       |
| Bachelors           | 198    | 80.5       |
| Masters             | 11     | 4.5        |
| Marital status      |        |            |
| Married             | 139    | 56.5       |
| Unmarried           | 106    | 43.1       |
| Divorced            | 1      | 0.4        |
| Religious           |        |            |



|                            |     |      |
|----------------------------|-----|------|
| Yes                        | 220 | 89.4 |
| No                         | 26  | 10.6 |
| Exercise                   |     |      |
| Not during the past month  | 114 | 58.5 |
| Less than once a week      | 38  | 15.4 |
| Once or twice a week       | 36  | 14.6 |
| Three or more times a week | 28  | 11.4 |
| Alcohol consumption        |     |      |
| Not during the past month  | 226 | 91.9 |
| Less than once a week      | 16  | 6.5  |
| Once or twice a week       | 3   | 1.2  |
| Three or more times a week | 1   | 0.4  |
| Cigarette consumption      |     |      |
| Not during the past month  | 244 | 99.2 |
| Less than once a week      | 2   | 0.8  |

157 **Work-related characteristics of the study participants**

158 Among the study participants, 92.7% were working as staff nurse and 46.3% had a work  
 159 experience of less than 5 years with the mean work experience of 8.20 years. Similarly, 58.12%  
 160 were stationed at general wards and the mean beds to nurses ratio was  $1.4 \pm 0.86$ , which means for  
 161 every five nurses there were an average of seven beds in the hospital (Table 2).

162 Table 2: Work related characteristics of the study participants.

N=246

| Characteristics                | Number | Percentage |
|--------------------------------|--------|------------|
| <b>Position</b>                |        |            |
| Staff Nurse                    | 228    | 92.7       |
| Nursing Officer                | 15     | 6.1        |
| Nursing Supervisor             | 3      | 1.2        |
| <b>Work experience (years)</b> |        |            |
| Mean                           | 8.20   |            |
| SD                             | ±7.74  |            |
| <b>Department</b>              |        |            |
| General wards                  | 143    | 58.12      |
| Intensive Care Units           | 59     | 23.98      |
| Operation Theatre              | 16     | 6.50       |
| Emergency                      | 12     | 4.87       |
| Psychiatry wards               | 11     | 4.47       |
| Out Patient Departments        | 5      | 2.03       |
| Beds to nurses ratio           |        | N=224      |
| Mean                           | 1.40   |            |
| SD                             | ±0.86  |            |

163 **Magnitude of burnout and sleep problems among the study participants**

164 Among the respondents, 88.2% scored  $\geq 2.10$  in disengagement subscale and 82.9% scored  $\geq 2.25$   
165 in exhaustion subscale of OLBI-S. Respondents who were both disengaged and exhausted i.e.,  
166 respondents with burnout were found to be 78.5%. Similarly, the mean PSQI global score of the  
167 respondents was 5.43 with SD of  $\pm 3.035$ . Among the respondents,  $\geq 5$  PSQI global score was

168 found among 40.2% implying a poor sleep quality. The mean PSQI global score was higher among  
 169 respondents who had burnout, which was significantly different to the non-burnout group (p-value  
 170 = 0.043) (  
 171 Table 3).

172 Table 3: Correlation of burnout and sleep quality among the study participants.

| Characteristics          | Burnout (%) | No burnout (%) | Total (%)  | Chi- square value | p-value            |
|--------------------------|-------------|----------------|------------|-------------------|--------------------|
| Overall sleep quality    |             |                |            |                   |                    |
| Mean PSQI ± SD           | 5.83±3.085  | 3.98±2.349     | 5.43±3.035 |                   | 0.043 <sup>#</sup> |
| Overall sleep quality    |             |                |            |                   |                    |
| Good                     | 106 (72.1)  | 41 (27.9)      | 147 (59.8) | 8.7               | 0.003              |
| Poor                     | 87 (87.9)   | 12 (12.1)      | 99 (40.2)  |                   |                    |
| Subjective sleep quality |             |                |            |                   |                    |
| Very good                | 35 (63.6)   | 20 (36.4)      | 55 (22.4)  | 13.2              | 0.001              |
| Fairly good              | 122 (79.7)  | 31 (20.3)      | 153 (62.2) |                   |                    |
| Fairly and very bad      | 36 (94.7)   | 2 (5.3)        | 38 (15.4)  |                   |                    |
| Sleep latency            |             |                |            |                   |                    |
| ≤15 minutes              | 47 (71.2)   | 19 (28.8)      | 66 (26.8)  | 4.0               | 0.262              |
| 16-30 minutes            | 79 (78.2)   | 22 (21.8)      | 101 (41.1) |                   |                    |
| 31-60 minutes            | 42 (84.0)   | 8 (16.0)       | 50 (20.3)  |                   |                    |
| >60 minutes              | 25 (86.2)   | 4 (13.8)       | 29 (11.8)  |                   |                    |
| Sleep duration           |             |                |            |                   |                    |
| ≥7 hours                 | 106 (77.4)  | 31 (22.6)      | 137 (55.7) | 4.3               | 0.114              |

|                            |            |           |            |      |        |
|----------------------------|------------|-----------|------------|------|--------|
| 6-7 hours                  | 60 (75.0)  | 20 (25.0) | 80 (32.6)  |      |        |
| <6 hours                   | 27 (93.1)  | 2 (6.9)   | 29 (11.7)  |      |        |
| Sleep efficiency           |            |           |            |      |        |
| ≥85%                       | 119 (78.8) | 32 (21.2) | 151 (61.4) | 2.7  | 0.256  |
| 75-84%                     | 50 (73.5)  | 18 (26.5) | 68 (27.6)  |      |        |
| <75%                       | 24 (88.9)  | 3 (11.1)  | 27 (11.0)  |      |        |
| Sleep disturbance          |            |           |            |      |        |
| Not during the past month  | 12 (57.1)  | 9 (42.9)  | 21 (8.5)   | 7.4  | 0.024  |
| Less than once a week      | 152 (79.2) | 40 (20.8) | 192 (78.1) |      |        |
| Once or more a week        | 29 (87.9)  | 4 (12.1)  | 33 (13.4)  |      |        |
| Use of sleep medication    |            |           |            |      |        |
| Not during the past month  | 179 (78.2) | 50 (21.8) | 229 (93.1) | 0.2  | 0.915  |
| Less than once a week      | 9 (81.8)   | 2 (18.2)  | 11 (4.5)   |      |        |
| Once or more a week        | 5 (83.3)   | 1 (16.7)  | 6 (2.4)    |      |        |
| Daytime dysfunction        |            |           |            |      |        |
| No problem at all          | 33 (49.3)  | 34 (50.7) | 67 (27.2)  | 46.5 | <0.001 |
| Only a very slight problem | 109 (88.6) | 14 (11.4) | 123 (50.0) |      |        |
| Somewhat to a big problem  | 51 (91.1)  | 5 (8.9)   | 56 (22.8)  |      |        |

#Independent sample t-test

### 173 **Factors associated with burnout**

174 The odds of burnout among study participants who were working in the position of staff nurse  
 175 were 6.0 (95% CI; 1.9-18.8) times higher than those working in the position of nursing officer or  
 176 supervisor. In regards to daytime dysfunction, study participants who reported a slight problem

177 were 6.6 (95% CI; 3.0-14.7) times and who reported somewhat to a big problem were 6.3 (95%  
 178 CI; 1.9-20.9) times more likely to have burnout than those who reported no any problem of day  
 179 time dysfunction (  
 180 Table 4). Similarly, using independent sample t-test significant difference was seen in beds-to-  
 181 nurses ratio (p-value = 0.029) among the respondents with burnout and their counterparts. There  
 182 also was a significant difference in age (p-value <0.001) and work experience (p-value <0.001)  
 183 among the respondents with burnout and their counterparts.

184 Table 4: Logistics regression analysis showing association between explanatory variables and  
 185 burnout among the study participants.

| Explanatory variables      | Burnout (%)      |                | Crude Odds        | Adjusted Odds     |
|----------------------------|------------------|----------------|-------------------|-------------------|
|                            | Yes<br>(n = 193) | No<br>(n = 53) | Ratio<br>(95% CI) | Ratio<br>(95% CI) |
| Position                   |                  |                |                   |                   |
| Staff nurse                | 186 (81.6)       | 42 (18.4)      | 6.9 (2.5-19.0)    | 6.0 (1.9-18.8)*   |
| Nursing officer/supervisor | 7 (38.9)         | 11 (61.1)      | Ref               | Ref               |
| Subjective sleep quality   |                  |                |                   |                   |
| Very good                  | 35 (63.6)        | 20 (36.4)      | Ref               | Ref               |
| Fairly good                | 122 (79.7)       | 31 (20.3)      | 2.5 (1.1-4.4)     | 1.3 (0.6-2.8)     |
| Fairly and very bad        | 36 (94.7)        | 2 (5.3)        | 10.2 (2.2-47.3)   | 3.2 (0.6-17.6)    |
| Sleep disturbance          |                  |                |                   |                   |
| Not during the past month  | 12 (57.1)        | 9 (42.9)       | Ref               | Ref               |
| Less than once a week      | 152 (79.2)       | 40 (20.8)      | 2.8 (1.1-7.2)     | 1.5 (0.5-4.5)     |
| Once or more a week        | 29 (87.9)        | 4 (12.1)       | 5.4 (1.4-21.1)    | 1.4 (0.3-7.4)     |

| Daytime dysfunction        |            |           |                 |                  |
|----------------------------|------------|-----------|-----------------|------------------|
| No problem at all          | 33 (49.3)  | 34 (50.7) | Ref             | Ref              |
| Only a very slight problem | 109 (88.6) | 14 (11.4) | 8.0 (3.8-16.7)  | 6.6 (3.0-14.7)** |
| Somewhat to a big problem  | 51 (91.1)  | 5 (8.9)   | 10.5 (3.7-29.6) | 6.3 (1.9-20.9)*  |

\* p-value less than 0.05

\*\* p-value less than 0.001

## 186 Discussion

187 This study aimed to find the prevalence of burnout and sleep problems among nurses, and the  
188 associated factors of burnout with various socio-demographic and work-related characteristics.  
189 The prevalence of burnout among the nurses in this study was 78.5% while, 88.2% were  
190 disengaged and 82.9% were exhausted. The prevalence of burnout was found to be much higher  
191 than the literature around the globe [1–3,7,18]. Since this is the first study done to map the  
192 prevalence of burnout among nurses in Nepal there are no other evidence. However, according to  
193 a multinational study that included Nepal the prevalence of burnout among nurses working in  
194 intensive care units was 52%, much lower than this study [6]. Similarly, a study among  
195 undergraduate medical students in Nepal report prevalence of burnout among 65.9% [10]. Since  
196 this study was done post the COVID-19 pandemic the results could have been exacerbated as  
197 suggested in a study where pandemic fatigue was found to have a significant negative correlation  
198 with mental health, job contentment and sleep quality among the nurses [19]. In this study,  
199 prevalence of disengagement was found to be higher than exhaustion which was different to the  
200 result from a metanalytic study which reported emotional exhaustion to be the most common  
201 dimension of burnout [5].

202 This study revealed a poor sleep quality among the nurses (40.2%). Although there is no previous  
203 data regarding sleep quality among nurses in Nepal, existing evidence suggest poor sleep quality  
204 among healthcare providers in a private hospital (48.03%) and undergraduate medical students  
205 (38.2%) [11,20]. The mean PSQI score of the nurses in this study was  $5.43 \pm 3.035$ , which was  
206 lesser in comparison to some studies from around the globe indicating a better sleep quality [2,21–  
207 23]. According to a study, nurses have an average sleep of less than 6 hours and this pattern of  
208 short sleep could be due to a lack of sleep opportunity rather than to sleep ability [8]. In this study  
209 however, the mean sleep hours of the nurses was  $6.8 \pm 1.1$  hours, which is not very less than the  
210 recommended seven to eight hours of sleep daily for adults [7].

211 This study demonstrates a significant association between the position and burnout among the  
212 nurses. Other studies also suggest that nurses working in lower positions have greater odds of  
213 burnout than their supervisors [1,3,24]. This may be due to greater work load among staff nurses  
214 or delegation of work from their supervisors, while lower control over the work. A study suggests  
215 that higher level nurses in comparison to their subordinates can better cope high-demanding  
216 situations due to greater control over work [25]. Similarly, lack of promotion opportunity and  
217 unfair evaluation of work could be a barrier to nurses to their work environment and health, which  
218 could be accounted to greater burnout among the staff nurses [26].

219 In this study, a significant difference in mean PSQI score was seen among nurses with burnout and  
220 their counterparts, with higher mean score among burnout group denoting poorer sleep quality.  
221 This association between burnout and sleep problem has been revealed in many other studies as  
222 well [1,8,27]. Among the seven parameters within sleep quality, daytime dysfunction refers to  
223 trouble staying awake and lack of enthusiasm while carrying out daily activities. This study  
224 revealed a significant association between burnout and daytime dysfunction among the nurses.

225 Daytime dysfunction could occur due to the demanding nature of shift work causing fatigue in the  
226 body and emotional stress among the nurses [1,28].

227 A significant association was seen between burnout among the nurses and, their age and work  
228 experience in this study. Some studies show that younger nurses are at greater risk of burnout,  
229 while others reveal that nurses aged over 38–40 years are more vulnerable to burnout. Studies that  
230 suggest that longer work experience makes nurses protected to burnout reveal this could be due to  
231 familiarization with the scope of work and the work environment [1,3,5]. Beds-to-nurses ratio was  
232 found to be significant with burnout among nurses in this study which was congruent to another  
233 study. A study suggests that with higher beds-to-nurses ratio there is increase in the workload, and  
234 subsequently the work stress of nurses [29]. A difference among emotional exhaustion between  
235 nurses working in acute medicine and emergency and accidents departments was noted in another  
236 study [5,30]. In this study however, significant association between work department and burnout  
237 among the nurses was not observed.

238 Although many literatures have associated burnout among nurses with higher education i.e.,  
239 Bachelor or above in comparison to those with Diploma, no such association could be found in  
240 this study [6]. Married or living with a spouse and being religious have been linked with protective  
241 effect among nurses [3,6]. Being religious is believed to strengthen people when coping with stress  
242 and work problems, and it often reduces the negative impact of these on mental health [31].  
243 Likewise, physical exercise has been shown to have a protective effect against burnout and studies  
244 report that with greater intensity of physical exercises risk of burnout is lower [32]. However, no  
245 such association was found in this study between burnout among the nurses and their marital status,  
246 religiousness or physical exercise.



247 **Conclusion**

248 A very high prevalence of burnout and poor sleep quality was found among the nurses in this  
249 study. Position and daytime dysfunction were significant correlates of burnout among the nurses.  
250 Similarly, age, work experience and beds-to-nurses ratio of the department was found to be  
251 significantly associated to burnout among the nurses. Based on the findings of this study, it is  
252 recommended to reduce work stress and manage sleep problems of the nurses especially focusing  
253 the junior position nursing staffs. There is a need to reevaluate the burden of work at various  
254 departments and ensure staffing of nurses relative to the work burden. Relevant strategies to  
255 enhance the mental health of the nurses through interventions like psychological help desk and  
256 support groups need to be established. Further prospective studies are required to better understand  
257 the cause-effect relationships of risk factors of burnout.

258 **Acknowledgement**

259 We thank all the respondents; the staff nurses, nursing officers and supervisors for their  
260 cooperation, valuable participation and honest response during data collection. We are grateful to  
261 Tribhuvan University Teaching Hospital for providing administrative approval to conduct the  
262 study.

263 **Supporting information**

264 S1 Data. Data underlying the results of the study

265 <https://docs.google.com/spreadsheets/d/1o8st->

266 [4gHzoC8fNbLonhqJlMJgUEx69uc/edit?usp=drive\\_link&oid=117602478348588754759&rtpof](https://docs.google.com/spreadsheets/d/1o8st-4gHzoC8fNbLonhqJlMJgUEx69uc/edit?usp=drive_link&oid=117602478348588754759&rtpof)

267 [=true&sd=true](https://docs.google.com/spreadsheets/d/1o8st-4gHzoC8fNbLonhqJlMJgUEx69uc/edit?usp=drive_link&oid=117602478348588754759&rtpof=true&sd=true)

## 268 **References**

- 269 [1] Vidotti V, Ribeiro RP, Galdino MJQ, Martins JT. Burnout Syndrome and shift work among  
270 the nursing staff. *Rev Lat Am Enfermagem* 2018;26. [https://doi.org/10.1590/1518-](https://doi.org/10.1590/1518-8345.2550.3022)  
271 [8345.2550.3022](https://doi.org/10.1590/1518-8345.2550.3022).
- 272 [2] Dong H, Zhang Q, Sun Z, Sang F, Xu Y. Sleep problems among Chinese clinical nurses  
273 working in general hospitals. *Occup Med (Chic Ill)* 2017;67:534–9.  
274 <https://doi.org/10.1093/occmed/kqx124>.
- 275 [3] Lasebikan VO, Oyetunde MO. Burnout among Nurses in a Nigerian General Hospital:  
276 Prevalence and Associated Factors. *ISRN Nurs* 2012;2012:1–6.  
277 <https://doi.org/10.5402/2012/402157>.
- 278 [4] Sun Q, Ji X, Zhou W, Liu J. Sleep problems in shift nurses: A brief review and  
279 recommendations at both individual and institutional levels. *J Nurs Manag* 2019.  
280 <https://doi.org/10.1111/jonm.12656>.
- 281 [5] Molina-Praena J, Ramirez-Baena L, Gómez-Urquiza JL, Cañadas GR, De la Fuente EI,  
282 Cañadas-De la Fuente GA. Levels of burnout and risk factors in medical area nurses: A  
283 meta-analytic study. *Int J Environ Res Public Health* 2018.  
284 <https://doi.org/10.3390/ijerph15122800>.
- 285 [6] See KC, Zhao MY, Nakataki E, Chittawatanarat K, Fang W-F, Faruq MO, et al. Professional  
286 burnout among physicians and nurses in Asian intensive care units: a multinational survey.  
287 *Intensive Care Med* 2018;44:2079–90. <https://doi.org/10.1007/s00134-018-5432-1>.
- 288 [7] Stewart NH, Arora VM. The Impact of Sleep and Circadian Disorders on Physician  
289 Burnout. *Chest* 2019. <https://doi.org/10.1016/j.chest.2019.07.008>.

- 290 [8] Geiger-Brown J, Rogers VE, Trinkoff AM, Kane RL, Bausell RB, Scharf SM. Sleep,  
291 sleepiness, fatigue, and performance of 12-hour-shift nurses. *Chronobiol Int* 2012.  
292 <https://doi.org/10.3109/07420528.2011.645752>.
- 293 [9] Söderström M, Jeding K, Ekstedt M, Perski A, Åkerstedt T. Insufficient sleep predicts  
294 clinical burnout. *J Occup Health Psychol* 2012;17:175–83.  
295 <https://doi.org/10.1037/a0027518>.
- 296 [10] Shrestha DB, Katuwal N, Tamang A, Paudel A, Gautam A, Sharma M, et al. Burnout among  
297 medical students of a medical college in Kathmandu; A cross-sectional study. *PLoS One*  
298 2021. <https://doi.org/10.1371/journal.pone.0253808>.
- 299 [11] Paudel K, Adhikari TB, Khanal P, Bhatta R, Paudel R, Bhusal S, et al. Sleep quality and its  
300 correlates among undergraduate medical students in Nepal: A cross-sectional study. *PLOS*  
301 *Global Public Health* 2022;2:e0000012. <https://doi.org/10.1371/journal.pgph.0000012>.
- 302 [12] Cochran WG. *Sampling Techniques*. 3rd ed. 1977.
- 303 [13] Kalliath TJ, O’Driscoll MP, Gillespie DF, Bluedorn AC. A test of the Maslach Burnout  
304 Inventory in three samples of healthcare professionals. *Work Stress* 2000;14:35–50.  
305 <https://doi.org/10.1080/026783700417212>.
- 306 [14] Demerouti E, health AB-H of stress and burnout in, 2008 undefined. The Oldenburg  
307 Burnout Inventory: A good alternative to measure burnout and engagement. *AcademiaEduE*  
308 Demerouti, AB Bakker *Handbook of Stress and Burnout in Health Care, 2008*•academiaEdu  
309 2007.
- 310 [15] Reis D, Xanthopoulou D, Tsaousis I. Measuring job and academic burnout with the  
311 Oldenburg Burnout Inventory (OLBI): Factorial invariance across samples and countries.  
312 *Burn Res* 2015;2:8–18. <https://doi.org/10.1016/j.burn.2014.11.001>.

- 313 [16] Buysse DJ, Reynolds CF, Monk TH, Berman SR, Kupfer DJ. The Pittsburgh Sleep Quality  
314 Index: a new instrument for psychiatric practice and research. *Psychiatry Res* 1989;28:193–  
315 213. [https://doi.org/10.1016/0165-1781\(89\)90047-4](https://doi.org/10.1016/0165-1781(89)90047-4).
- 316 [17] Bursac Z, Gauss CH, Williams DK, Hosmer DW. Purposeful selection of variables in  
317 logistic regression. *Source Code Biol Med* 2008;3:1–8. [https://doi.org/10.1186/1751-0473-](https://doi.org/10.1186/1751-0473-3-17/TABLES/6)  
318 [3-17/TABLES/6](https://doi.org/10.1186/1751-0473-3-17/TABLES/6).
- 319 [18] Rezaei S, Karami Matin B, Hajizadeh M, Soroush A, Nouri B. Prevalence of burnout among  
320 nurses in Iran: a systematic review and meta-analysis. *Int Nurs Rev* 2018;65:361–9.  
321 <https://doi.org/10.1111/inr.12426>.
- 322 [19] Labrague LJ. Pandemic fatigue and clinical nurses’ mental health, sleep quality and job  
323 contentment during the covid-19 pandemic: The mediating role of resilience. *J Nurs Manag*  
324 2021;29:1992–2001. <https://doi.org/10.1111/jonm.13383>.
- 325 [20] Kafle B, Tiwari S, Pokhrel A, Shrestha R, Bagale Y, Pahari N. Poor Quality of Sleep among  
326 Healthcare Workers in a Tertiary Care Centre. *Journal of Nepal Medical Association*  
327 2024;62:118–20. <https://doi.org/10.31729/jnma.8435>.
- 328 [21] Demir Zencirci A, Arslan S. Morning-evening type and burnout level as factors influencing  
329 sleep quality of shift nurses: a questionnaire study. *Croat Med J* 2011;52:527–37.  
330 <https://doi.org/10.3325/cmj.2011.52.527>.
- 331 [22] Tu Z, He J, Zhou N. Sleep quality and mood symptoms in conscripted frontline nurse in  
332 Wuhan, China during COVID-19 outbreak. *Medicine* 2020;99:e20769.  
333 <https://doi.org/10.1097/MD.00000000000020769>.

- 334 [23] Park E, Lee HY, Park CS-Y. Association between sleep quality and nurse productivity  
335 among Korean clinical nurses. *J Nurs Manag* 2018;26:1051–8.  
336 <https://doi.org/10.1111/jonm.12634>.
- 337 [24] Ferreira N do N, Lucca SR de. Síndrome de burnout em técnicos de enfermagem de um  
338 hospital público do Estado de São Paulo. *Revista Brasileira de Epidemiologia* 2015;18:68–  
339 79. <https://doi.org/10.1590/1980-5497201500010006>.
- 340 [25] JOHANSSON G, SANDAHL C, HASSON D. Role stress among first-line nurse managers  
341 and registered nurses - a comparative study. *J Nurs Manag* 2013;21:449–58.  
342 <https://doi.org/10.1111/j.1365-2834.2011.01311.x>.
- 343 [26] Thapa DR, Subedi M, Ekström-Bergström A, Areskoug Josefsson K, Krettek A. Facilitators  
344 for and barriers to nurses' work-related health-a qualitative study. *BMC Nurs* 2022;21:218.  
345 <https://doi.org/10.1186/s12912-022-01003-z>.
- 346 [27] Vela-Bueno A, Moreno-Jiménez B, Rodríguez-Muñoz A, Olavarrieta-Bernardino S,  
347 Fernández-Mendoza J, De la Cruz-Troca JJ, et al. Insomnia and sleep quality among  
348 primary care physicians with low and high burnout levels. *J Psychosom Res* 2008;64:435–  
349 42. <https://doi.org/10.1016/j.jpsychores.2007.10.014>.
- 350 [28] PEREIRA DS, ARAÚJO TSSL, GOIS CFL, GOIS JÚNIOR JP, RODRIGUEZ EOL,  
351 SANTOS V dos. Occupational stressors among nurses working in urgent and emergency  
352 care units. *Rev Gaucha Enferm* 2014;35:55–61. [https://doi.org/10.1590/1983-  
353 1447.2014.01.39824](https://doi.org/10.1590/1983-1447.2014.01.39824).
- 354 [29] Dall'Ora C, Ball J, Reinius M, Griffiths P. Burnout in nursing: a theoretical review. *Hum*  
355 *Resour Health* 2020;18:1–17. [https://doi.org/http://dx.doi.org/10.1186/s12960-020-00469-  
356 9](https://doi.org/http://dx.doi.org/10.1186/s12960-020-00469-9).

- 357 [30] Gillespie M, Melby V. Burnout among nursing staff in accident and emergency and acute  
358 medicine: a comparative study. *J Clin Nurs* 2003;12:842–51.  
359 <https://doi.org/10.1046/j.1365-2702.2003.00802.x>.
- 360 [31] Galea M. Assessing the Incremental Validity of Spirituality in Predicting Nurses’ Burnout.  
361 *Archive for the Psychology of Religion* 2014;36:118–36.  
362 <https://doi.org/10.1163/15736121-12341276>.
- 363 [32] de Vries JD, Claessens BJC, van Hooff MLM, Geurts SAE, van den Bossche SNJ, Kompier  
364 MAJ. Disentangling longitudinal relations between physical activity, work-related fatigue,  
365 and task demands. *Int Arch Occup Environ Health* 2016;89:89–101.  
366 <https://doi.org/10.1007/s00420-015-1054-x>.
- 367

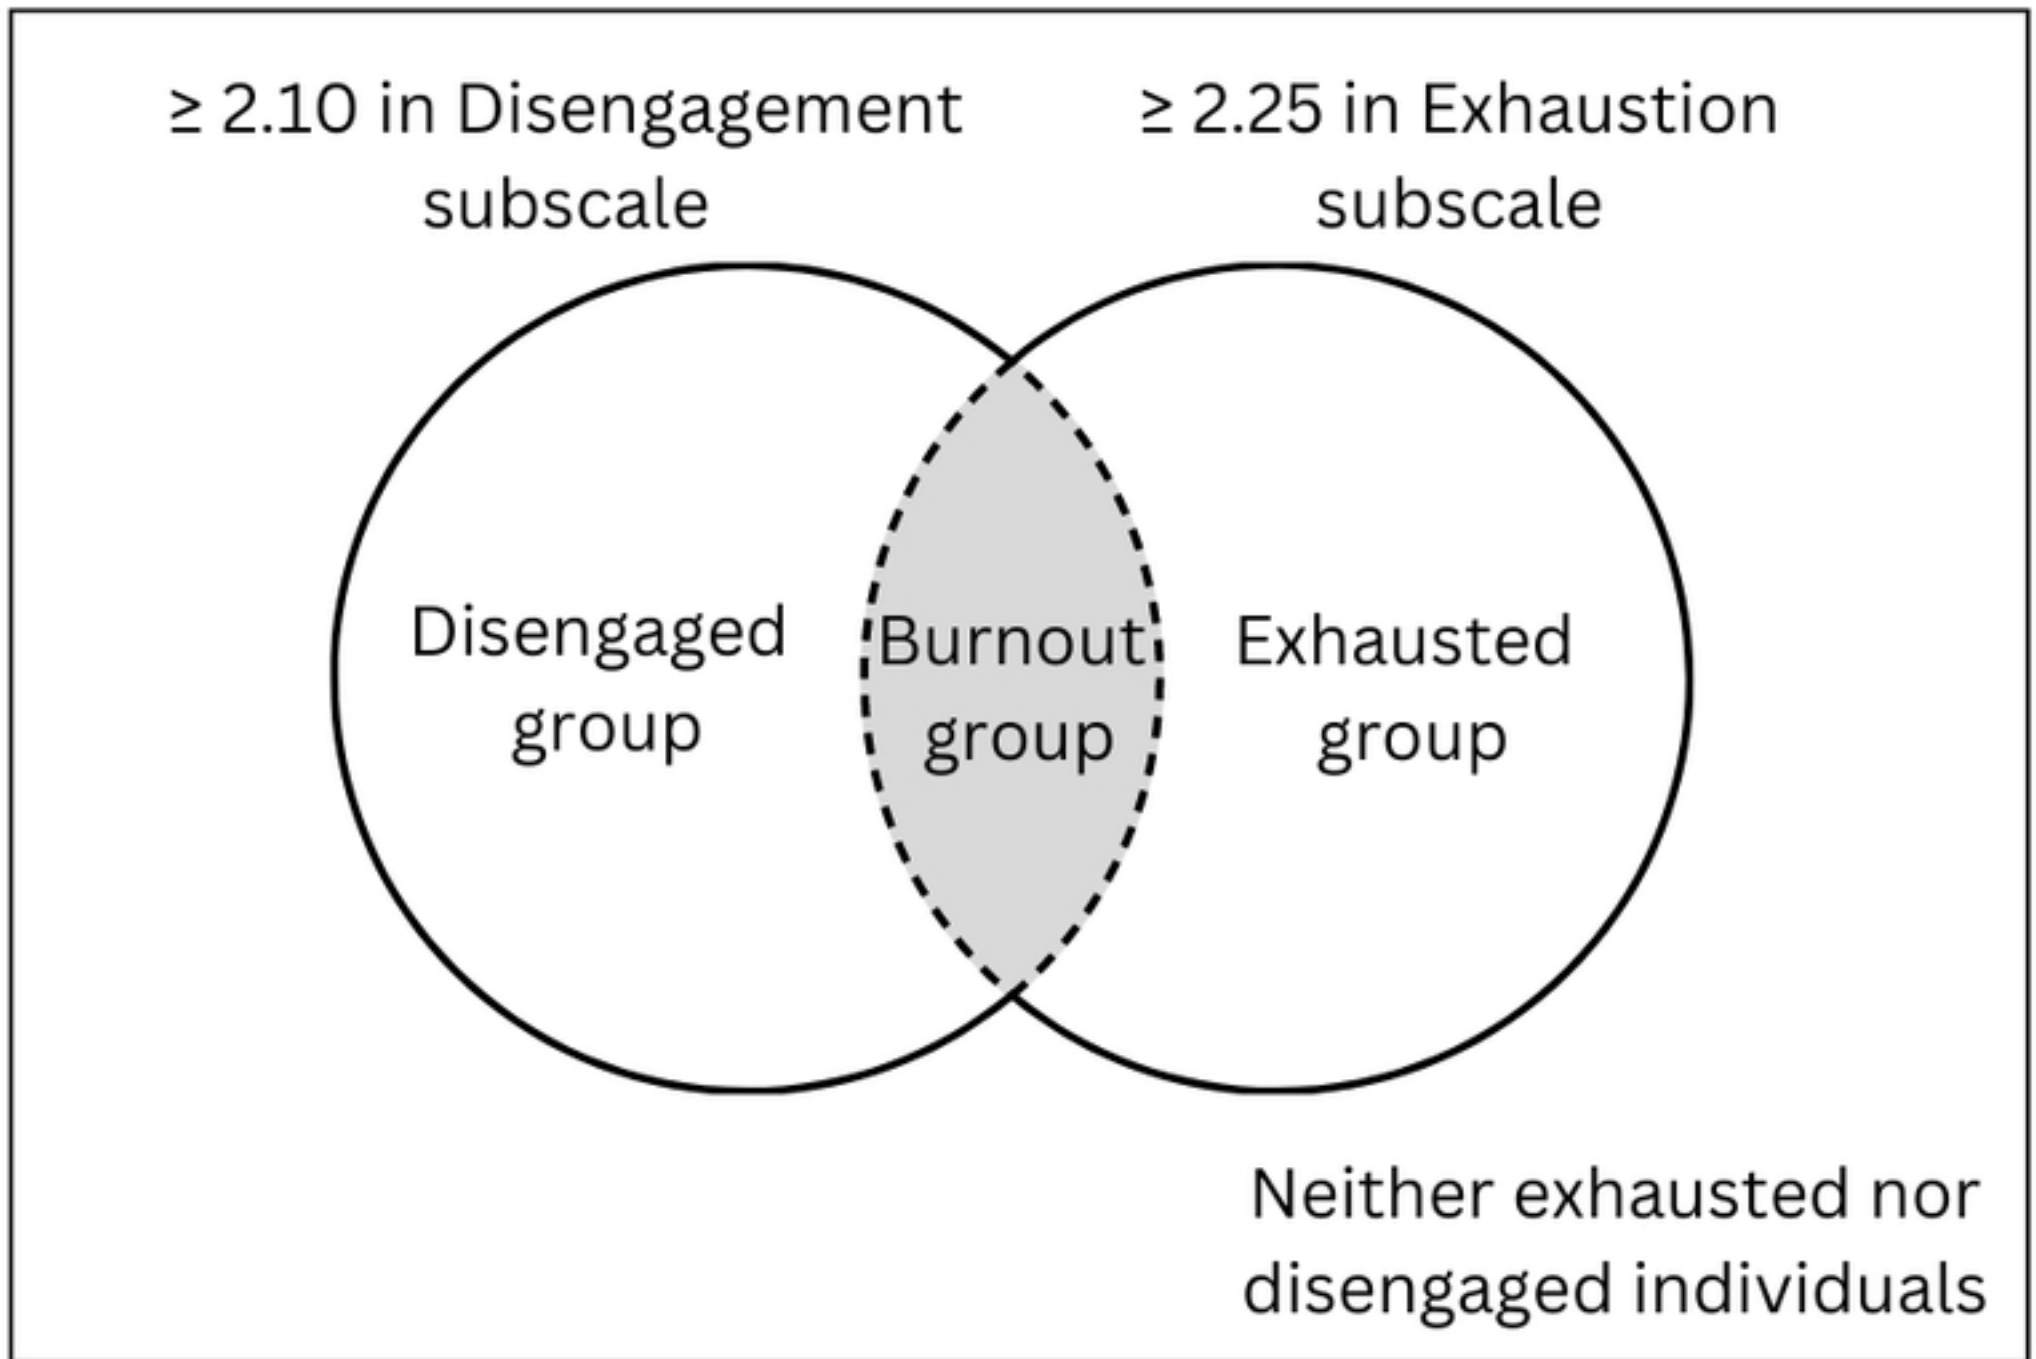

Figure 1
